# Supplementary material for: Ordered mesoporous carbons codoped with nitrogen and iron as effective catalysts for oxygen reduction reaction
Source: Royal Society of Chemistry journal article supplement (doi:10.1039/c6nr05884a), 2016-01-01
Supplement: c6nr05884a1.pdf [file c6nr05884a1.pdf]

Electronic Supplementary Information

**Iron and nitrogen codoped ordered mesoporous carbons as non-precious metal catalysts for oxygen reduction reaction**

Xiaojun Liu,<sup>a</sup> Shouzhong Zou<sup>\*a</sup> and Shaowei Chen<sup>\*b</sup>

<sup>a</sup> Department of Chemistry, American University, 4400 Massachusetts Avenue N.W. Washington, DC 20016, United States

<sup>b</sup> Department of Chemistry and Biochemistry, University of California, 1156 High Street, Santa Cruz, California 95064, United States

E-mails: szou@american.edu (S. Z. Z); shaowei@ucsc.edu (S.W.C)

**Table S1.** Comparison of ORR performances of Fe,N co-doped carbons in recent literature

| Authors        | Catalyst loading (mg/cm <sup>2</sup> ) | Onset potential (V vs. RHE) | n (Potentials V vs. RHE)   | High Stability | Tolerance to crossover effect | Reference                                        |
|----------------|----------------------------------------|-----------------------------|----------------------------|----------------|-------------------------------|--------------------------------------------------|
| Liu et al.     | 0.39                                   | + 0.94                      | ~3.97 (+0.45 to +0.65 V)   | Yes            | Yes                           | Adv. Mater. 2013, 25, 6879–6883                  |
| Silva et al.   | 0.1                                    | + 0.94                      | 3.78 (+0.3 to +0.7 V)      | Yes            | Yes                           | J. Am. Chem. Soc. 2013, 135, 7823                |
| Liang et al.   | 0.6                                    | + 0.84 V                    | ~3.95 (at +0.5 V)          | Yes            | Unkown                        | J. Am. Chem. Soc. 2013, 135, 16002               |
| Lin et al.     | 0.1                                    | + 0.92 V                    | ~3.96 (+0.1 to +1.1 V)     | Yes            | Yes                           | J. Am. Chem. Soc. 2014, 136, 11027               |
| Hou et al.     | 0.7                                    | 0.91 V                      | 3.08~3.52 (+0.5 to +0.7 V) | Yes            | Yes                           | Adv. Energy Mater. 2014, 4, 1400337              |
| Yan et al.     | 0.61                                   | +0.95 V                     | 3.0-4.0 (+0.37 to +0.77 V) | Yes            | Yes                           | J. Mater. Chem. A, 2014, 2, 8617                 |
| Lai et al.     | 0.04                                   | + 0.874                     | ~3.77 (+0.8 to +1.0)       | Yes            | Yes                           | ACS Appl. Mater. Interfaces 2015, 7, 18170–18178 |
| Xi et al.      | 0.40                                   | + 0.91 V                    | ~3.7 (+0.4 to +0.6)        | Yes            | Unkown                        | Chem. Commun., 2015, 51, 10479                   |
| Niu et al      | 0.08                                   | +0.98 V                     | ~3.95 (+0.5 to +0.8)       | Yes            | Yes                           | J. Am. Chem. Soc. 2015, 137, 5555–5562           |
| Meng et al.    | 0.26                                   | +1.027 V                    | ~4.05 (+0.3 to 0.6 V)      | Yes            | Unkown                        | Adv. Mater. 2016, DOI: 10.1002/adma.201602490    |
| Ferrero et al. | 0.10                                   | + 0.94 V                    | ~3.7 (at +0.58 V)          | Yes            | Yes                           | ACS Nano, 2016, 10, 5922–5932                    |
| Cui et al.     | 0.60                                   | + 1.025 V                   | ~3.69(+0.2 to +0.6 V)      | Yes            | Yes                           | Adv.Funct.Mater.,2016,26, 5708–5717              |
| This work      | 0.08                                   | +0.99 V                     | 3.5-3.82 (0 to 0.85 V)     | Yes            | Yes                           |                                                  |

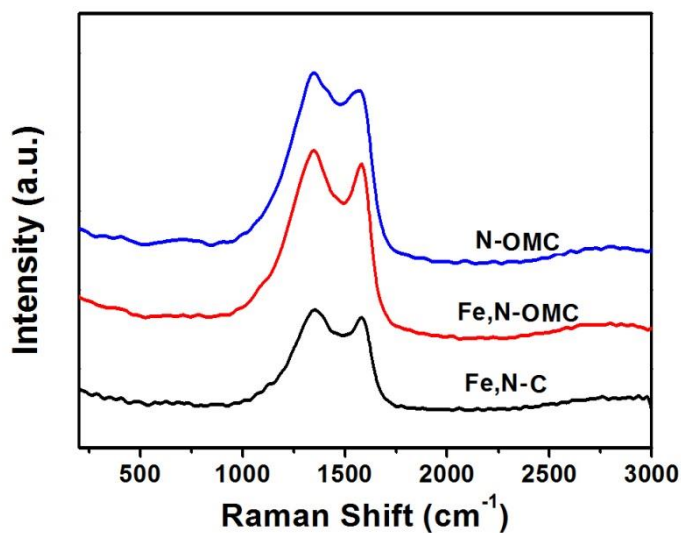

**Figure S1.** Raman spectra of Fe,N-C, Fe,N-OMC and N-OMC.

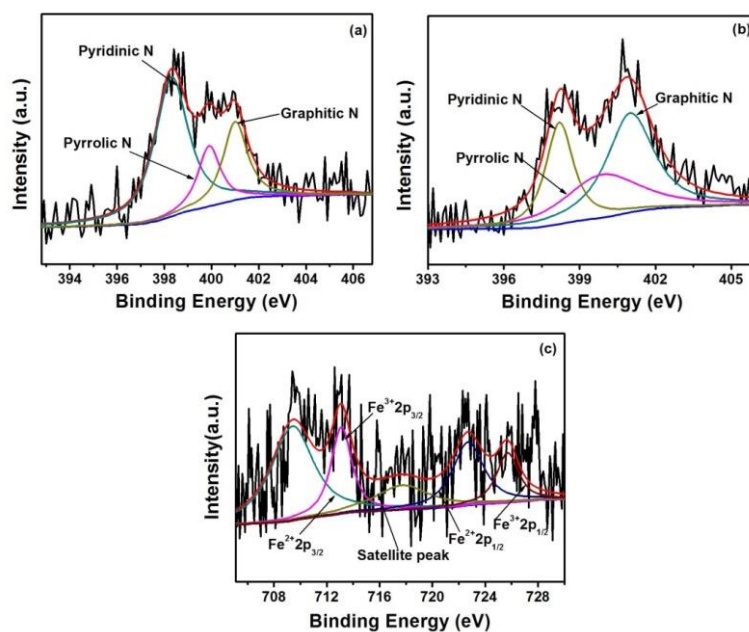

**Figure S2.** Peak deconvolutions of the N 1s spectra of (a) Fe,N-C and (b) N-OMC; and (c) the Fe 2p spectrum of Fe,N-C.

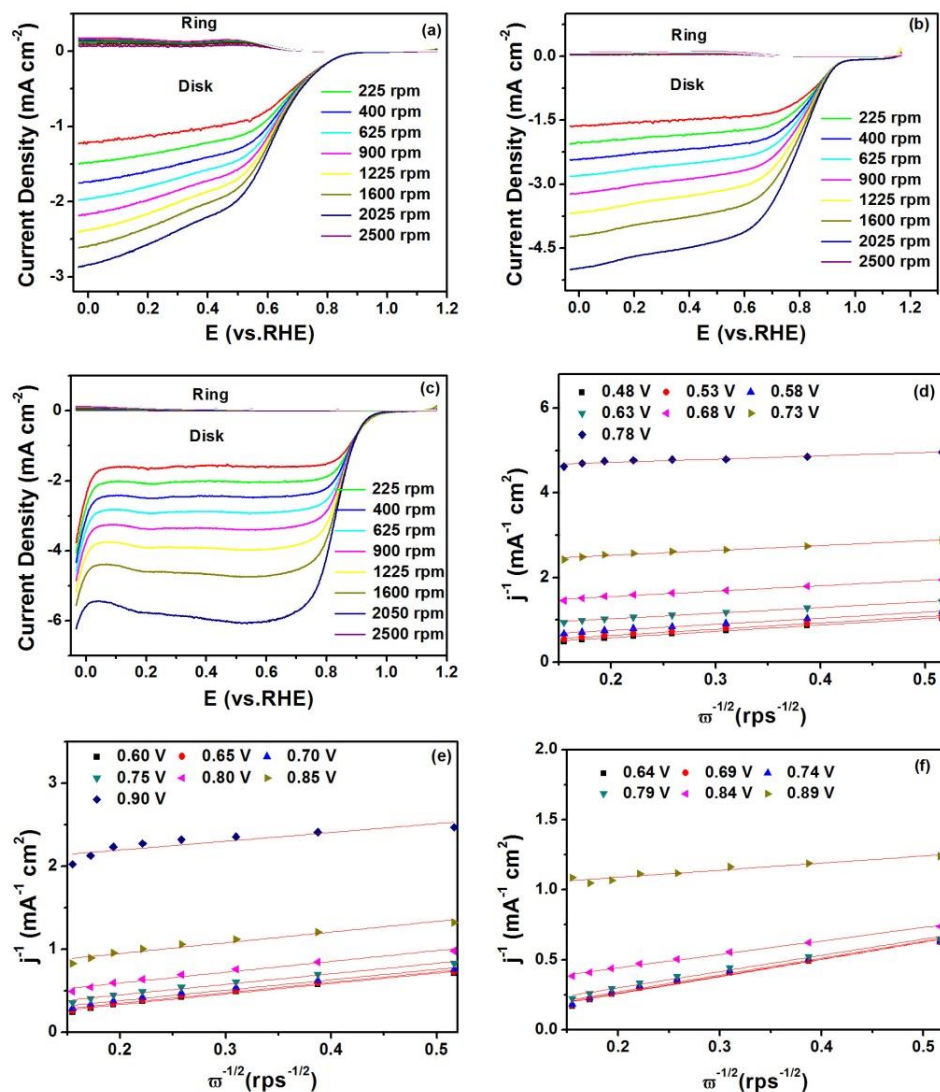

**Figure S3.** Polarization curves for ORR in O<sub>2</sub>-saturated 0.1 M KOH solution on (a) Fe,N-C, (b) N-OMC and (c) Pt/C electrode at various rotation rates; and the corresponding Koutecky–Levich plots of (d) Fe,N-C, (e) N-OMC and (f) Pt/C at different electrode potentials.
